# Supplementary material for: Endothelial Cell-Derived SO2 Controls Endothelial Cell Inflammation, Smooth Muscle Cell Proliferation, and Collagen Synthesis to Inhibit Hypoxic Pulmonary Vascular Remodelling
Source: Oxid Med Cell Longev. 2021 Apr 17;2021:5577634. doi: 10.1155/2021/5577634 (PMC8068783; doi:10.1155/2021/5577634)
Supplement: Supplementary 4 — Figure S4: AAT1 overexpression inhibits hypoxia-induced activation of p50 in PAECs. (a) Western blot analysis was used to detect the phosphorylation level of p50 protein in HPAECs (n = 9). (b) The distribution of p50 protein in HPAECs was detected by immunofluorescence in situ. Green fluorescence represents p50 protein. (c) Active motif-ELISA was performed to detect the DNA-binding activity of p50 in HPAECs (n = 9). (d) Immunofluorescence was used to in situ detect p-p50 protein expression in mouse PAECs, green fluorescence represents p-p50 protein. The data were expressed as mean ± SEM, ∗p < 0.05, scale: 20 μm. [file 5577634.f4.zip]

Archive with 2 entries (2 files):
- Fig. S4a-S4b.pdf
- Fig. S4c-S4d.pdf
