# Supplementary figures and images for: Endothelial Cell‐Derived SO2 Controls Endothelial Cell Inflammation, Smooth Muscle Cell Proliferation, and Collagen Synthesis to Inhibit Hypoxic Pulmonary Vascular Remodelling
Source: Hindawi journal article supplement (doi:10.1155/2021/5577634), 2021-01-01

**c**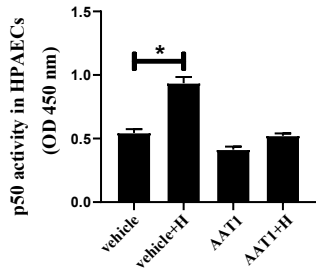**d**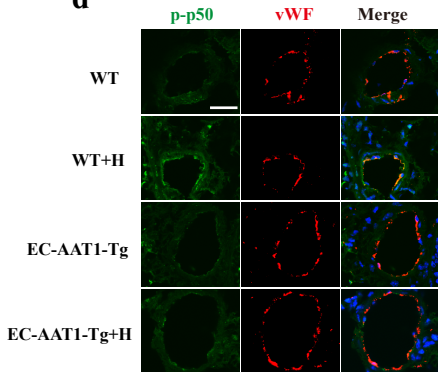

Supplement: f4 [file 5577634.f4.zip]

**a**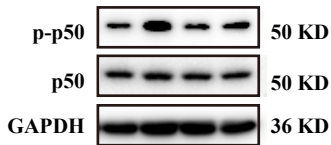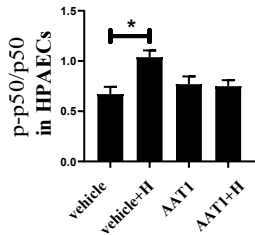**b**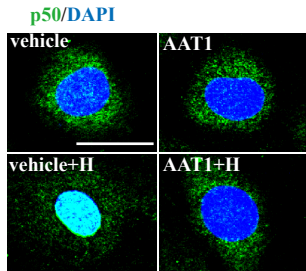

Supplement: f4 [file 5577634.f4.zip]
